# Supplementary material for: Gene Expression Patterns Unveil New Insights in Papillary Thyroid Cancer
Source: MDPI journal article supplement (doi:10.3390/medicina55080500), 2019-08-19
Supplement: s1 [file s1]

(A) Down-regulated genes

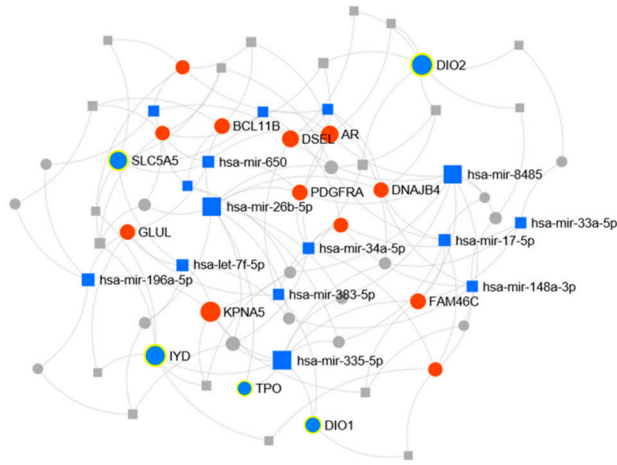

(B) Up-regulated genes

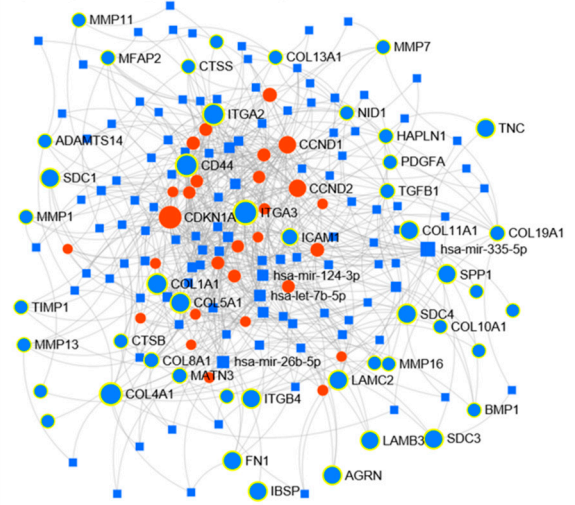

**Figure S1.** Interconnected gene network with specific miRNAs, generated using miRnet. (A) mRNA-miRNA network for down-regulated genes in PTC (based on Reactome classification) was related to Thyroxine biosynthesis, Neuronal System or Developmental Biology; (B) up-regulated genes in PTC (based on Reactome classification) were related to extracellular matrix organization, degradation of the extracellular matrix, collagen degradation.

## (A) Classic PTC cancer

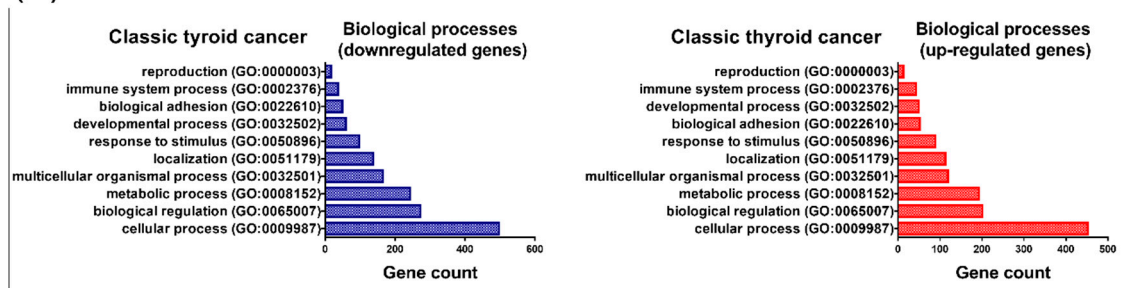

## (B) Follicular PTC cancer

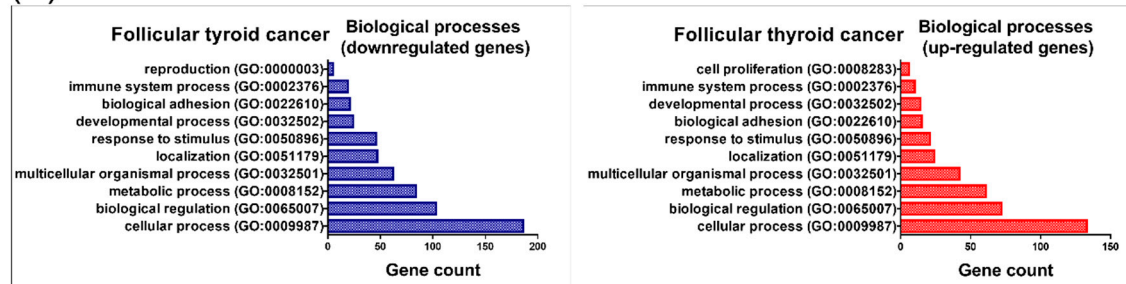

## (C) Tall-cell PTC cancer

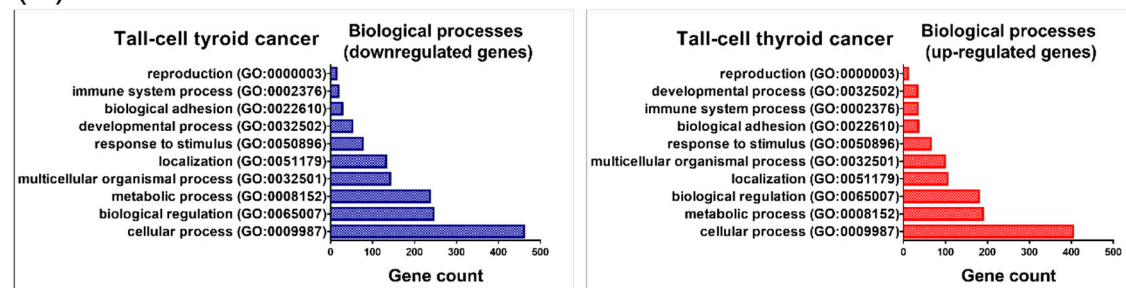

**Figure S2.** Bar graphs, displaying the enriched GO of differential expressed genes (using Panther Gene Ontology online tool) for the main subtypes of papillary thyroid cancer: (A) classic, (B) follicular variant and (C) tall-cell.
